# Supplementary material for: Hypercoagulability Is a Stronger Risk Factor for Ischaemic Stroke than for Myocardial Infarction: A Systematic Review
Source: PubMed Central journal article supplement (PMC4529149; doi:10.1371/journal.pone.0133523), 2015-08-07
Supplement: pone.0133523.s006.pdf [file pone.0133523.s006.pdf]

**S3 Table. Genotypic measurements sorted alphabetically.**

| <b>ID</b> | <b>Factor(contrast)</b>           | <b>RR MI</b> | <b>RR IS</b> | <b>RRR (95% CI)</b> |
|-----------|-----------------------------------|--------------|--------------|---------------------|
| 184       | antithrombin SNP 1734 (allele)    | 1.02         | 1.01         | 0.99 (0.64 - 1.54)  |
| 244       | antithrombin SNP 2415 (allele)    | 1.00         | 1.11         | 1.11 (0.75 - 1.65)  |
| 261       | antithrombin SNP 5403 (allele)    | 0.91         | 1.06         | 1.16 (0.54 - 2.51)  |
| 173       | antithrombin SNP 7199 (allele)    | 1.05         | 1.01         | 0.96 (0.62 - 1.49)  |
| 226       | antithrombin SNP 9089 (allele)    | 1.01         | 1.08         | 1.07 (0.81 - 1.41)  |
| 260       | FGA 251 (allele)                  | 0.93         | 1.07         | 1.15 (0.87 - 1.52)  |
| 121       | FGA 3807 (allele)                 | 1.07         | 0.82         | 0.77 (0.52 - 1.12)  |
| 267       | FGA 5498 (allele)                 | 0.92         | 1.15         | 1.25 (0.84 - 1.86)  |
| 194       | FGA 6534 (allele)                 | 0.96         | 0.97         | 1.01 (0.77 - 1.33)  |
| 162       | FGA 9205 (allele)                 | 0.99         | 0.94         | 0.95 (0.66 - 1.37)  |
| 299       | FGA SNP Thr312Ala rs6050 (allele) | 0.82         | 0.43         | 0.52 (0.15 - 1.8)   |
| 212       | FGB 1083 (allele)                 | 0.97         | 1.01         | 1.04 (0.71 - 1.52)  |
| 177       | FGB 11079 (allele)                | 1.02         | 0.99         | 0.97 (0.73 - 1.28)  |
| 139       | FGB 1643 (allele)                 | 1.02         | 0.91         | 0.89 (0.64 - 1.24)  |
| 134       | FGB 9487 (allele)                 | 1.00         | 0.87         | 0.87 (0.62 - 1.23)  |
| 306       | FGB SNP 455G/A rs1800790 (allele) | 0.98         | 1.76         | 1.8 (0.32 - 10.06)  |
| 183       | FGG 129 (allele)                  | 0.94         | 0.93         | 0.99 (0.73 - 1.34)  |
| 255       | FGG 5836 (allele)                 | 1.13         | 1.28         | 1.13 (0.57 - 2.24)  |
| 148       | FGG 902 (allele)                  | 1.10         | 1.02         | 0.93 (0.7 - 1.22)   |
| 234       | FGG 9340 (allele)                 | 0.94         | 1.02         | 1.09 (0.81 - 1.46)  |
| 296       | FII SNP C148T (or G455A) (allele) | 1.10         | 0.93         | 0.85 (0.45 - 1.6)   |
| 227       | FII SNP 21239 (allele)            | 1.00         | 1.07         | 1.07 (0.82 - 1.4)   |
| 253       | FII SNP 280 (allele)              | 0.94         | 1.06         | 1.13 (0.7 - 1.82)   |
| 259       | FII SNP 3696 (allele)             | 1.03         | 1.18         | 1.15 (0.51 - 2.58)  |
| 252       | FII SNP 4992 (allele)             | 1.03         | 1.16         | 1.13 (0.83 - 1.52)  |
| 257       | FII SNP 5389 (allele)             | 1.01         | 1.15         | 1.14 (0.86 - 1.51)  |
| 215       | FII SNP 5467 (allele)             | 1.09         | 1.14         | 1.05 (0.72 - 1.52)  |
| 214       | FII SNP 7530 (allele)             | 1.10         | 1.15         | 1.05 (0.73 - 1.5)   |
| 319       | FII SNP G20210A (dominant)        | 4.00         | 1.60         | 0.4 (0 - 77.58)     |
| 48        | FII SNP G20210A (dominant)        | 1.70         | 1.10         | 0.65 (0.19 - 2.2)   |
| 285       | FII SNP G20210A (dominant)        | 5.42         | 4.00         | 0.74 (0 - 112.99)   |
| 303       | FII SNP G20210A (dominant)        | 1.00         | 1.00         | 1 (0.12 - 8.33)     |
| 242       | FII SNP G20210A (allele)          | 1.39         | 1.54         | 1.11 (0.41 - 3.03)  |
| 297       | FII SNP G20210A (dominant)        | 0.80         | 1.10         | 1.38 (0.31 - 6.05)  |
| 45        | FII SNP G20210A (dominant)        | 0.88         | 1.40         | 1.59 (0.16 - 15.37) |
| 152       | FIX SNP 10948 (allele)            | 1.08         | 1.01         | 0.94 (0.4 - 2.2)    |
| 114       | FIX SNP 12806 (allele)            | 1.54         | 0.99         | 0.64 (0.24 - 1.74)  |
| 250       | FIX SNP 16171 (allele)            | 0.76         | 0.85         | 1.12 (0.44 - 2.84)  |
| 235       | FIX SNP 21554 (allele)            | 0.99         | 1.08         | 1.09 (0.66 - 1.8)   |
| 185       | FIX SNP 21975 (allele)            | 0.96         | 0.96         | 1 (0.6 - 1.66)      |
| 240       | FIX SNP 27226 (allele)            | 1.04         | 1.15         | 1.11 (0.62 - 1.97)  |
| 124       | FIX SNP 30893 (allele)            | 0.82         | 0.63         | 0.77 (0.28 - 2.08)  |
| 241       | FIX SNP 35124 (allele)            | 1.04         | 1.15         | 1.11 (0.64 - 1.92)  |
| 136       | FIX SNP 4135 (allele)             | 1.17         | 1.02         | 0.87 (0.55 - 1.39)  |
| 246       | FIX SNP 6347 (allele)             | 0.94         | 1.05         | 1.12 (0.68 - 1.84)  |
| 223       | FIX SNP 716 (allele)              | 1.00         | 1.06         | 1.06 (0.66 - 1.71)  |
| 318       | FV Leiden (dominant)              | 2.40         | 0.00         | #NULL!              |
| 46        | FV Leiden (dominant)              | 0.81         | 0.42         | 0.52 (0.14 - 1.88)  |
| 47        | FV Leiden (dominant)              | 0.80         | 0.51         | 0.64 (0.08 - 5)     |
| 295       | FV Leiden (dominant)              | 1.50         | 1.00         | 0.67 (0.14 - 3.13)  |

|     |                                     |      |      |                     |
|-----|-------------------------------------|------|------|---------------------|
| 49  | FV Leiden (dominant)                | 0.83 | 0.68 | 0.82 (0.38 - 1.77)  |
| 50  | FV Leiden (dominant)                | 0.91 | 0.88 | 0.97 (0.31 - 2.98)  |
| 51  | FV Leiden (dominant)                | 0.85 | 0.96 | 1.13 (0.41 - 3.11)  |
| 286 | FV Leiden (dominant)                | 3.75 | 4.28 | 1.14 (0.05 - 24.1)  |
| 334 | FV Leiden (dominant)                | 0.77 | 1.12 | 1.45 (0.16 - 13.07) |
| 305 | FV Leiden (dominant)                | 1.10 | 1.80 | 1.64 (0.45 - 6)     |
| 105 | FV Leiden (allele)                  | 1.22 | 2.98 | 2.44 (0.6 - 10)     |
| 294 | FV Leiden (dominant)                | 0.76 | 2.60 | 3.42 (0.11 - 104)   |
| 149 | FV SNP 17557 (allele)               | 1.04 | 0.97 | 0.93 (0.7 - 1.25)   |
| 264 | FV SNP lower 29565 (allele)         | 0.96 | 1.16 | 1.21 (0.87 - 1.69)  |
| 239 | FV SNP lower 30539 (allele)         | 1.05 | 1.16 | 1.1 (0.72 - 1.7)    |
| 176 | FV SNP lower 3578 (allele)          | 1.02 | 0.99 | 0.97 (0.74 - 1.27)  |
| 182 | FV SNP lower 35788 (allele)         | 1.15 | 1.13 | 0.98 (0.58 - 1.65)  |
| 74  | FV SNP Rs2269648 (allele)           | 1.11 | 0.86 | 0.77 (0.38 - 1.57)  |
| 87  | FV SNP Rs2420369 (allele)           | 1.17 | 1.26 | 1.08 (0.51 - 2.28)  |
| 100 | FV SNP Rs3753305 (allele)           | 0.98 | 1.36 | 1.39 (0.67 - 2.86)  |
| 96  | FV SNP Rs6013 (allele)              | 1.12 | 1.41 | 1.26 (0.47 - 3.37)  |
| 82  | FV SNP Rs6019 (allele)              | 1.13 | 1.13 | 1 (0.21 - 4.68)     |
| 97  | FV SNP Rs6030 (allele)              | 1.11 | 1.41 | 1.27 (0.61 - 2.66)  |
| 102 | FV SNP Rs6035 (allele)              | 1.26 | 2.19 | 1.74 (0.56 - 5.4)   |
| 104 | FV SNP Rs7542281 (allele)           | 1.11 | 2.46 | 2.22 (0.65 - 7.56)  |
| 72  | FV SNP Rs9332575 (allele)           | 1.05 | 0.68 | 0.65 (0.28 - 1.5)   |
| 84  | FV SNP Rs9332590 (allele)           | 1.03 | 1.10 | 1.07 (0.55 - 2.08)  |
| 95  | FV SNP Rs9332591 (allele)           | 1.14 | 1.39 | 1.22 (0.51 - 2.92)  |
| 90  | FV SNP Rs9332618 (allele)           | 0.93 | 1.02 | 1.1 (0.51 - 2.38)   |
| 92  | FV SNP Rs9332640 (allele)           | 1.22 | 1.40 | 1.15 (0.52 - 2.55)  |
| 76  | FV SNP Rs9332695 (allele)           | 0.85 | 0.71 | 0.84 (0.24 - 2.85)  |
| 91  | FV SNP Rs970741 (allele)            | 1.04 | 1.19 | 1.14 (0.55 - 2.4)   |
| 275 | FV SNP upper 38592 (allele)         | 1.03 | 1.53 | 1.49 (0.69 - 3.21)  |
| 147 | FV SNP upper 42713 (allele)         | 1.10 | 1.02 | 0.93 (0.7 - 1.23)   |
| 180 | FV SNP upper 45765 (allele)         | 1.00 | 0.98 | 0.98 (0.56 - 1.71)  |
| 219 | FV SNP upper 45888 (allele)         | 0.91 | 0.96 | 1.05 (0.78 - 1.42)  |
| 113 | FV SNP upper 46058 (allele)         | 1.74 | 1.07 | 0.61 (0.21 - 1.83)  |
| 137 | FV SNP upper 66464 (allele)         | 1.06 | 0.94 | 0.89 (0.51 - 1.53)  |
| 169 | FV SNP upper 66872 (allele)         | 0.94 | 0.90 | 0.96 (0.68 - 1.35)  |
| 217 | FV SNP upper 68717 (allele)         | 0.97 | 1.02 | 1.05 (0.8 - 1.37)   |
| 116 | FV SNP upper 72877 (allele)         | 1.20 | 0.82 | 0.68 (0.35 - 1.32)  |
| 271 | FVII SNP 115 (allele)               | 1.07 | 1.40 | 1.31 (0.28 - 6.14)  |
| 222 | FVII SNP 15386 (allele)             | 1.00 | 1.06 | 1.06 (0.7 - 1.61)   |
| 112 | FVII SNP 16826 (allele)             | 1.75 | 0.49 | 0.28 (0.03 - 2.4)   |
| 170 | FVII SNP 18311 (allele)             | 0.97 | 0.93 | 0.96 (0.73 - 1.26)  |
| 198 | FVII SNP 185 (allele)               | 0.95 | 0.97 | 1.02 (0.74 - 1.4)   |
| 192 | FVII SNP 2643 (allele)              | 0.99 | 1.00 | 1.01 (0.76 - 1.34)  |
| 274 | FVIII SNP 139972 (allele)           | 0.83 | 1.20 | 1.45 (0.68 - 3.08)  |
| 282 | FVIII SNP 165293 rs6655259 (allele) | 0.54 | 2.55 | 4.72 (0.62 - 35.73) |
| 280 | FVIII SNP 25167 (allele)            | 0.75 | 2.10 | 2.8 (0.7 - 11.2)    |
| 276 | FVIII SNP 55941 (allele)            | 1.04 | 1.56 | 1.5 (0.9 - 2.5)     |
| 278 | FVIII SNP 95826 (allele)            | 0.94 | 1.70 | 1.81 (1.02 - 3.2)   |
| 143 | FVIII SNP 95910 (allele)            | 1.28 | 1.16 | 0.91 (0.42 - 1.96)  |
| 161 | FX SNP 11962 (allele)               | 0.99 | 0.94 | 0.95 (0.73 - 1.24)  |
| 258 | FX SNP 14881 (allele)               | 0.97 | 1.11 | 1.14 (0.79 - 1.65)  |
| 164 | FX SNP 16893 (allele)               | 1.00 | 0.95 | 0.95 (0.74 - 1.22)  |
| 228 | FX SNP 17396 (allele)               | 0.98 | 1.05 | 1.07 (0.8 - 1.44)   |

|     |                                          |      |      |                     |
|-----|------------------------------------------|------|------|---------------------|
| 172 | FX SNP 18352 (allele)                    | 1.02 | 0.98 | 0.96 (0.64 - 1.45)  |
| 279 | FX SNP 22739 (allele)                    | 0.69 | 1.31 | 1.9 (0.21 - 16.96)  |
| 168 | FX SNP 26242 (allele)                    | 0.92 | 0.88 | 0.96 (0.66 - 1.38)  |
| 268 | FX SNP 4544 (allele)                     | 0.96 | 1.20 | 1.25 (0.83 - 1.87)  |
| 197 | FX SNP 8946 (allele)                     | 0.99 | 1.01 | 1.02 (0.78 - 1.33)  |
| 123 | FX SNP 9501 (allele)                     | 0.99 | 0.76 | 0.77 (0.51 - 1.17)  |
| 265 | FXI SNP 10942 (allele)                   | 1.06 | 1.29 | 1.22 (0.83 - 1.78)  |
| 202 | FXI SNP 20423 (allele)                   | 0.91 | 0.93 | 1.02 (0.72 - 1.46)  |
| 205 | FXI SNP 228771 (allele)                  | 1.00 | 1.03 | 1.03 (0.78 - 1.35)  |
| 165 | FXI SNP 25455 (allele)                   | 1.01 | 0.96 | 0.95 (0.71 - 1.26)  |
| 238 | FXI SNP 26011 (allele)                   | 1.06 | 1.17 | 1.1 (0.75 - 1.62)   |
| 128 | FXI SNP 3450 (allele)                    | 1.00 | 0.81 | 0.81 (0.59 - 1.11)  |
| 166 | FXI SNP 3543 (allele)                    | 1.04 | 0.99 | 0.95 (0.73 - 1.24)  |
| 277 | FXI SNP 4197 (allele)                    | 0.96 | 1.52 | 1.58 (0.61 - 4.1)   |
| 248 | FXI SNP 6783 (allele)                    | 1.10 | 1.23 | 1.12 (0.69 - 1.81)  |
| 337 | FXII SNP (dominant)                      | 4.80 | 4.10 | 0.85 (0.06 - 12.73) |
| 122 | FXII SNP 6570 (allele)                   | 1.16 | 0.89 | 0.77 (0.34 - 1.75)  |
| 195 | FXII SNP 7532 (allele)                   | 1.04 | 1.06 | 1.02 (0.77 - 1.34)  |
| 247 | FXIIIa SNP 148318 (allele)               | 1.02 | 1.14 | 1.12 (0.8 - 1.55)   |
| 140 | FXIIIa SNP 165306 (allele)               | 1.12 | 1.01 | 0.9 (0.65 - 1.25)   |
| 157 | FXIIIa SNP 165399 (allele)               | 1.04 | 0.98 | 0.94 (0.71 - 1.26)  |
| 144 | FXIIIa SNP 170779 (allele)               | 1.12 | 1.02 | 0.91 (0.64 - 1.29)  |
| 167 | FXIIIa SNP 176866 (allele)               | 1.08 | 1.03 | 0.95 (0.68 - 1.34)  |
| 281 | FXIIIa SNP 177424 rs3024462 (allele)     | 0.49 | 1.82 | 3.71 (0.62 - 22.35) |
| 178 | FXIIIa SNP 177778 (allele)               | 1.12 | 1.09 | 0.97 (0.57 - 1.67)  |
| 269 | FXIIIa SNP 4377 (allele)                 | 0.92 | 1.16 | 1.26 (0.93 - 1.71)  |
| 115 | FXIIIa SNP 72060 (allele)                | 1.00 | 0.67 | 0.67 (0.27 - 1.66)  |
| 301 | FXIIIa SNP Pro564Leu (dominant)          | 1.40 | 0.89 | 0.64 (0.31 - 1.29)  |
| 324 | FXIIIa SNP Pro564Leu (dominant)          | 0.80 | 0.99 | 1.24 (0.33 - 4.63)  |
| 328 | FXIIIa SNP Tir204Phe (dominant)          | 1.02 | 1.95 | 1.91 (0.2 - 18.29)  |
| 317 | FXIIIa SNP Tyr204phe (dominant)          | 0.82 | 9.10 | 11.1 (5.64 - 21.82) |
| 302 | FXIIIa SNP Val34Leu (dominant)           | 1.07 | 0.77 | 0.72 (0.36 - 1.43)  |
| 111 | FXIIIa SNP Val34Leu (dominant)           | 1.00 | 1.33 | 1.33 (0.62 - 2.84)  |
| 325 | FXIIIa SNP Val34Leu (Val/Leu vs Val/Val) | 0.80 | 1.19 | 1.49 (0.4 - 5.5)    |
| 331 | FXIIIa SNP Val34Leu (Leu/Leu vs Val/Val) | 0.77 | 3.59 | 4.66 (0.44 - 49.1)  |
| 224 | FXIIIb SNP 17686 (allele)                | 1.08 | 1.15 | 1.06 (0.78 - 1.45)  |
| 181 | FXIIIb SNP 29759 (allele)                | 1.11 | 1.09 | 0.98 (0.75 - 1.28)  |
| 179 | FXIIIb SNP 5995 (allele)                 | 0.92 | 0.90 | 0.98 (0.75 - 1.28)  |
| 225 | FXIIIb SNP 7319 (allele)                 | 0.90 | 0.96 | 1.07 (0.69 - 1.66)  |
| 141 | FXIIIb SNP 9706 (allele)                 | 1.05 | 0.95 | 0.9 (0.64 - 1.29)   |
| 307 | FXIIIb SNP His95Arg (dominant)           | 0.79 | 1.70 | 2.15 (0.88 - 5.25)  |
| 327 | GPIa SNP C807T (recessive)               | 1.26 | 2.24 | 1.78 (0.45 - 7.04)  |
| 322 | GPIa SNP glu/Lys (recessive)             | 1.06 | 0.96 | 0.91 (0.18 - 4.58)  |
| 330 | GPIb SNP thr/Met (recessive)             | 0.58 | 1.48 | 2.55 (0.48 - 13.69) |
| 109 | GPIb-alpha SNP HPA-2 (allele)            | 2.09 | 2.40 | 1.15 (0.23 - 5.65)  |
| 110 | GPIb-alpha VNTR (allele)                 | 1.71 | 2.23 | 1.3 (0.31 - 5.43)   |
| 320 | GPIIb SNP ile/Ser (recessive)            | 1.85 | 1.20 | 0.65 (0.18 - 2.37)  |
| 321 | GPIIIa SNP Leu/pro (recessive)           | 1.14 | 1.01 | 0.89 (0.24 - 3.27)  |
| 88  | ICAM1 SNP Rs281432 (allele)              | 1.22 | 1.32 | 1.08 (0.51 - 2.3)   |
| 70  | ICAM1 SNP Rs3093030 (allele)             | 1.04 | 0.57 | 0.55 (0.26 - 1.17)  |
| 85  | ICAM1 SNP Rs3093032 (allele)             | 1.08 | 1.16 | 1.07 (0.48 - 2.42)  |
| 94  | ICAM1 SNP Rs5030341 (allele)             | 1.25 | 1.52 | 1.22 (0.57 - 2.59)  |
| 81  | ICAM1 SNP Rs5030347 (allele)             | 0.97 | 0.97 | 1 (0.93 - 1.08)     |

|     |                                           |      |      |                    |
|-----|-------------------------------------------|------|------|--------------------|
| 98  | ICAM1 SNP Rs5030390 (allele)              | 1.23 | 1.59 | 1.29 (0.3 - 5.61)  |
| 199 | PAI-1 SNP 10381 (allele)                  | 0.94 | 0.96 | 1.02 (0.63 - 1.66) |
| 191 | PAI-1 SNP 12219 (allele)                  | 1.01 | 1.02 | 1.01 (0.79 - 1.3)  |
| 190 | PAI-1 SNP 4588 (allele)                   | 1.01 | 1.02 | 1.01 (0.68 - 1.49) |
| 323 | PAI-1 SNP 4G/5G (4G/4G vs 5G/5G)          | 0.40 | 0.49 | 1.23 (0.24 - 6.14) |
| 326 | PAI-1 SNP 4G/5G (allele)                  | 0.50 | 0.84 | 1.68 (0.45 - 6.24) |
| 329 | PAI-1 SNP 4G/5G (4G/5G vs 4G/4G)          | 0.52 | 1.10 | 2.12 (0.51 - 8.69) |
| 283 | PAI-1 SNP 4G/5G promotor (4G/4G vs 5G/5G) | 0.96 | 0.49 | 0.51 (0.11 - 2.4)  |
| 44  | PAI-1 SNP 4G/5G promotor (allele)         | 0.93 | 1.10 | 1.18 (0.55 - 2.53) |
| 218 | PAI-1 SNP 5878 (allele)                   | 0.95 | 1.00 | 1.05 (0.75 - 1.47) |
| 245 | PAI-1 SNP 664 (allele)                    | 0.99 | 1.10 | 1.11 (0.84 - 1.48) |
| 237 | plasminogen SNP 1470 (allele)             | 1.00 | 1.10 | 1.1 (0.77 - 1.58)  |
| 251 | plasminogen SNP 15255 (allele)            | 0.96 | 1.08 | 1.13 (0.87 - 1.46) |
| 131 | plasminogen SNP 18114 (allele)            | 1.21 | 1.01 | 0.83 (0.63 - 1.11) |
| 155 | plasminogen SNP 1983 (allele)             | 1.02 | 0.96 | 0.94 (0.67 - 1.33) |
| 220 | plasminogen SNP 2967 (allele)             | 1.04 | 1.10 | 1.06 (0.81 - 1.38) |
| 203 | plasminogen SNP 31439 (allele)            | 0.83 | 0.85 | 1.02 (0.75 - 1.39) |
| 272 | plasminogen SNP 34158 (allele)            | 1.20 | 1.58 | 1.32 (0.7 - 2.49)  |
| 146 | plasminogen SNP 406 (allele)              | 0.97 | 0.89 | 0.92 (0.7 - 1.2)   |
| 236 | plasminogen SNP 41108 (allele)            | 0.92 | 1.01 | 1.1 (0.77 - 1.57)  |
| 120 | plasminogen SNP 41494 (allele)            | 1.15 | 0.87 | 0.76 (0.31 - 1.87) |
| 153 | plasminogen SNP 54925 (allele)            | 1.09 | 1.02 | 0.94 (0.51 - 1.72) |
| 273 | prot C receptor SNP 3600 (allele)         | 0.74 | 0.99 | 1.34 (0.6 - 2.97)  |
| 175 | prot C receptor SNP 6196 (allele)         | 0.98 | 0.95 | 0.97 (0.73 - 1.28) |
| 118 | prot C receptor SNP 837 (allele)          | 1.00 | 0.74 | 0.74 (0.46 - 1.2)  |
| 196 | prot C receptor SNP rs1415772 (allele)    | 1.02 | 1.04 | 1.02 (0.74 - 1.4)  |
| 208 | prot C SNP 10454 (allele)                 | 0.93 | 0.96 | 1.03 (0.74 - 1.44) |
| 266 | prot C SNP 11310 (allele)                 | 0.95 | 1.16 | 1.22 (0.92 - 1.62) |
| 216 | prot C SNP 2583 (allele)                  | 1.01 | 1.06 | 1.05 (0.8 - 1.37)  |
| 135 | prot C SNP 3220 (allele)                  | 1.00 | 0.87 | 0.87 (0.42 - 1.79) |
| 130 | prot C SNP 4515 (allele)                  | 1.07 | 0.89 | 0.83 (0.63 - 1.1)  |
| 174 | prot C SNP 4732 (allele)                  | 0.97 | 0.94 | 0.97 (0.7 - 1.33)  |
| 133 | prot C SNP 4919 (allele)                  | 1.05 | 0.91 | 0.87 (0.67 - 1.13) |
| 193 | prot C SNP 5867 (allele)                  | 0.98 | 0.99 | 1.01 (0.73 - 1.39) |
| 101 | prot C SNP Rs1401296 (allele)             | 1.04 | 1.48 | 1.42 (0.67 - 3.03) |
| 78  | prot C SNP Rs1799810 (allele)             | 1.13 | 1.08 | 0.96 (0.49 - 1.86) |
| 103 | prot C SNP Rs2069920 (allele)             | 0.79 | 1.52 | 1.92 (0.93 - 3.96) |
| 80  | prot C SNP Rs2069923 (allele)             | 1.11 | 1.09 | 0.98 (0.22 - 4.3)  |
| 73  | prot C SNP Rs2069928 (allele)             | 0.96 | 0.73 | 0.76 (0.37 - 1.56) |
| 77  | prot C SNP Rs5937 (allele)                | 1.21 | 1.04 | 0.86 (0.44 - 1.66) |
| 40  | prot S rs 867186 (GG vs AA)               | 1.27 | 1.14 | 0.9 (0.24 - 3.4)   |
| 43  | prot S rs2069948 (CC vs TT)               | 1.08 | 1.27 | 1.18 (0.8 - 1.74)  |
| 142 | prot S SNP 13154 (allele)                 | 1.06 | 0.96 | 0.91 (0.65 - 1.25) |
| 233 | prot S SNP 26890 (allele)                 | 0.98 | 1.06 | 1.08 (0.7 - 1.67)  |
| 210 | prot S SNP 288 (allele)                   | 1.05 | 1.09 | 1.04 (0.74 - 1.45) |
| 187 | prot S SNP 430 (allele)                   | 0.94 | 0.94 | 1 (0.76 - 1.31)    |
| 150 | prot S SNP 66205 (allele)                 | 1.07 | 1.00 | 0.93 (0.72 - 1.21) |
| 206 | prot S SNP 66847 (allele)                 | 1.00 | 1.03 | 1.03 (0.66 - 1.62) |
| 108 | PSGL-1 VNTR (allele)                      | 0.89 | 0.51 | 0.57 (0.25 - 1.33) |
| 158 | TAFI SNP 10152 (allele)                   | 1.07 | 1.01 | 0.94 (0.7 - 1.28)  |
| 20  | TAFI SNP 1040C/T (CC vs TT)               | 0.48 | 0.86 | 1.79 (0.45 - 7.11) |
| 119 | TAFI SNP 18857 (allele)                   | 1.17 | 0.87 | 0.74 (0.35 - 1.59) |
| 163 | TAFI SNP 2103 (allele)                    | 0.99 | 0.94 | 0.95 (0.65 - 1.39) |

|     |                                      |      |      |                     |
|-----|--------------------------------------|------|------|---------------------|
| 200 | TAFI SNP 31427 (allele)              | 0.94 | 0.96 | 1.02 (0.77 - 1.35)  |
| 201 | TAFI SNP 32627 (allele)              | 0.94 | 0.96 | 1.02 (0.77 - 1.35)  |
| 145 | TAFI SNP 35605 (allele)              | 1.04 | 0.95 | 0.91 (0.69 - 1.21)  |
| 117 | TAFI SNP 36326 (allele)              | 1.10 | 0.81 | 0.74 (0.37 - 1.47)  |
| 17  | TAFI SNP -438G/A (GG vs AA)          | 0.91 | 0.96 | 1.05 (0.21 - 5.39)  |
| 230 | TAFI SNP 47956 (allele)              | 1.05 | 1.13 | 1.08 (0.72 - 1.62)  |
| 188 | TAFI SNP 48100 (allele)              | 0.87 | 0.87 | 1 (0.63 - 1.58)     |
| 132 | TAFI SNP 4947 (allele)               | 1.30 | 1.11 | 0.85 (0.51 - 1.42)  |
| 15  | TAFI SNP 505G/A (GG vs AA)           | 1.44 | 0.84 | 0.58 (0.14 - 2.41)  |
| 256 | TAFI SNP 51208 (allele)              | 1.03 | 1.17 | 1.14 (0.86 - 1.5)   |
| 129 | TAFI SNP 54691 (allele)              | 1.10 | 0.91 | 0.83 (0.61 - 1.12)  |
| 151 | TAFI SNP 7826 (allele)               | 0.92 | 0.86 | 0.93 (0.72 - 1.22)  |
| 221 | TF SNP 11185 (allele)                | 0.86 | 0.91 | 1.06 (0.52 - 2.16)  |
| 160 | TF SNP 13925 (allele)                | 1.11 | 1.05 | 0.95 (0.71 - 1.27)  |
| 189 | TF SNP 5334 (allele)                 | 1.08 | 1.09 | 1.01 (0.74 - 1.37)  |
| 186 | TF SNP 599 (allele)                  | 0.92 | 0.92 | 1 (0.76 - 1.31)     |
| 213 | TF SNP 7877 (allele)                 | 1.12 | 1.17 | 1.04 (0.58 - 1.9)   |
| 159 | TFPI SNP 1502 (allele)               | 1.10 | 1.04 | 0.95 (0.71 - 1.25)  |
| 138 | TFPI SNP 21164 (allele)              | 1.09 | 0.97 | 0.89 (0.51 - 1.56)  |
| 262 | TFPI SNP 2418 (allele)               | 0.90 | 1.05 | 1.17 (0.9 - 1.51)   |
| 243 | TFPI SNP 34214 (allele)              | 0.91 | 1.01 | 1.11 (0.83 - 1.48)  |
| 209 | TFPI SNP 3437 (allele)               | 1.08 | 1.12 | 1.04 (0.57 - 1.89)  |
| 207 | thombomodulin SNP 5110 (allele)      | 0.96 | 0.99 | 1.03 (0.77 - 1.37)  |
| 232 | thombomodulin SNP 4007 (allele)      | 1.02 | 1.10 | 1.08 (0.78 - 1.49)  |
| 231 | thombomodulin SNP 5318 (allele)      | 1.03 | 1.11 | 1.08 (0.78 - 1.49)  |
| 127 | thombomodulin SNP 6235 (allele)      | 1.09 | 0.88 | 0.81 (0.58 - 1.13)  |
| 83  | thombomodulin SNP Rs1042580 (allele) | 0.96 | 0.98 | 1.02 (0.49 - 2.14)  |
| 93  | thombomodulin SNP Rs1962 (allele)    | 1.03 | 1.25 | 1.21 (0.56 - 2.64)  |
| 86  | thombomodulin SNP Rs3176119 (allele) | 0.79 | 0.85 | 1.08 (0.28 - 4.09)  |
| 71  | thombomodulin SNP Rs3176123 (allele) | 0.94 | 0.58 | 0.62 (0.3 - 1.28)   |
| 75  | thombomodulin SNP Rs3216183 (allele) | 1.02 | 0.81 | 0.79 (0.35 - 1.78)  |
| 99  | thombomodulin SNP Rs6048519 (allele) | 0.98 | 1.28 | 1.31 (0.63 - 2.69)  |
| 79  | thombomodulin SNP Rs6082986 (allele) | 1.00 | 0.98 | 0.98 (0.46 - 2.07)  |
| 89  | thombomodulin SNP Rs6113909 (allele) | 0.98 | 1.07 | 1.09 (0.48 - 2.49)  |
| 154 | t-PA SNP 12047 (allele)              | 0.99 | 0.93 | 0.94 (0.73 - 1.21)  |
| 156 | t-PA SNP 12264 (allele)              | 1.02 | 0.96 | 0.94 (0.6 - 1.47)   |
| 229 | t-PA SNP 16039 (allele)              | 0.98 | 1.05 | 1.07 (0.82 - 1.41)  |
| 204 | t-PA SNP 17825 (allele)              | 1.01 | 1.04 | 1.03 (0.79 - 1.35)  |
| 249 | t-PA SNP 22323 (allele)              | 0.93 | 1.04 | 1.12 (0.79 - 1.59)  |
| 126 | t-PA SNP 2586 (allele)               | 0.93 | 0.73 | 0.78 (0.41 - 1.51)  |
| 125 | t-PA SNP 30619 (allele)              | 1.07 | 0.83 | 0.78 (0.51 - 1.18)  |
| 254 | t-PA SNP 35171 (allele)              | 1.00 | 1.13 | 1.13 (0.85 - 1.51)  |
| 263 | t-PA SNP 6388 (allele)               | 0.92 | 1.10 | 1.2 (0.74 - 1.92)   |
| 171 | t-PA SNP 6971 (allele)               | 0.99 | 0.95 | 0.96 (0.6 - 1.53)   |
| 211 | t-PA SNP 9823 (allele)               | 0.98 | 1.02 | 1.04 (0.8 - 1.36)   |
| 270 | t-PA SNP 9944 (allele)               | 0.84 | 1.08 | 1.29 (0.66 - 2.5)   |
| 18  | VWF SNP rs1063857 (dominant)         | 1.15 | 1.35 | 1.17 (0.64 - 2.16)  |
| 336 | VWF SNP P475S (dominant)             | 0.56 | 0.98 | 1.75 (0.1 - 31.18)  |
| 19  | VWF SNP rs216293 (dominant)          | 1.26 | 1.50 | 1.19 (0.69 - 2.05)  |
| 52  | VWF SNP sma I (recessive)            | 1.81 | 3.29 | 1.82 (0.32 - 10.34) |

ID, identification number; RR IS, relative risk for ischaemic stroke; RR MI, relative risk for myocardial

infarction; RRR relative risk ratio.
