# Supplementary material for: Hypercoagulability Is a Stronger Risk Factor for Ischaemic Stroke than for Myocardial Infarction: A Systematic Review
Source: PubMed Central journal article supplement (PMC4529149; doi:10.1371/journal.pone.0133523), 2015-08-07
Supplement: pone.0133523.s007.pdf [file pone.0133523.s007.pdf]

**S4 Table. All prothrombotic factors sorted by ID.**

| <b>ID</b> | <b>Factor(contrast)</b>                       | <b>RR MI</b> | <b>RR IS</b> | <b>RRR (95% CI)</b> |
|-----------|-----------------------------------------------|--------------|--------------|---------------------|
| 1         | fibrinogen (Q4 vs Q1)                         | 2.18         | 1.26         | 0.58                |
| 2         | FXII (Q4 vs Q1)                               | 1.17         | 1.16         | 0.99 (0.27 - 3.7)   |
| 3         | FVII:c (Q4 vs Q1)                             | 1.00         | 1.00         | 1                   |
| 4         | FIX (Q4 vs Q1)                                | 0.93         | 0.96         | 1.03 (0.27 - 3.92)  |
| 5         | FXI (Q4 vs Q1)                                | 1.27         | 1.62         | 1.28 (0.33 - 4.86)  |
| 6         | FV (Q4 vs Q1)                                 | 1.22         | 1.59         | 1.3 (0.34 - 5.02)   |
| 7         | VWF (Q4 vs Q1)                                | 1.21         | 1.71         | 1.41                |
| 8         | FX (Q4 vs Q1)                                 | 0.61         | 0.88         | 1.44 (0.37 - 5.66)  |
| 9         | plasminogen (Q4 vs Q1)                        | 0.81         | 1.20         | 1.48 (0.34 - 6.4)   |
| 10        | prot C (high) (Q4 vs Q1)                      | 1.03         | 1.54         | 1.50                |
| 11        | FII (Q4 vs Q1)                                | 0.89         | 1.34         | 1.51 (0.32 - 7.04)  |
| 12        | FVIII:c (Q4 vs Q1)                            | 1.22         | 1.93         | 1.58                |
| 13        | prot C (Q1 vs Q5)                             | 0.92         | 1.52         | 1.65 (1.05 - 2.6)   |
| 14        | alpha2 antiplasmin (Q4 vs Q1)                 | 0.81         | 1.36         | 1.68 (0.39 - 7.21)  |
| 15        | TAFI SNP 505G/A (GG vs AA)                    | 1.44         | 0.84         | 0.58 (0.14 - 2.41)  |
| 16        | CLT (fibrinolytic potential) (>90 percentile) | 2.60         | 1.90         | 0.73 (0.24 - 2.26)  |
| 17        | TAFI SNP -438G/A (GG vs AA)                   | 0.91         | 0.96         | 1.05 (0.21 - 5.39)  |
| 18        | VWF SNP rs1063857 (dominant)                  | 1.15         | 1.35         | 1.17 (0.64 - 2.16)  |
| 19        | VWF SNP rs216293 (dominant)                   | 1.26         | 1.50         | 1.19 (0.69 - 2.05)  |
| 20        | TAFI SNP 1040C/T (CC vs TT)                   | 0.48         | 0.86         | 1.79 (0.45 - 7.11)  |
| 21        | d-dimer (T3 vs T1)                            | 1.39         | 1.56         | 1.12 (0.52 - 2.42)  |
| 22        | t-PA (T3 vs T1)                               | 0.92         | 1.38         | 1.5 (0.69 - 3.27)   |
| 23        | VWF (T3 vs T1)                                | 1.24         | 1.93         | 1.56 (0.72 - 3.34)  |
| 24        | aggregation (whole blood) (Q5 vs Q1)          | 1.00         | 0.25         | 0.25 (0.07 - 0.93)  |
| 25        | PLT aggregation (first) (Q5 vs Q1)            | 1.31         | 0.64         | 0.49 (0.18 - 1.31)  |
| 26        | TAT (T3 vs T1)                                | 0.97         | 0.71         | 0.73 (0.27 - 1.95)  |
| 27        | VWF (T3 vs T1)                                | 1.09         | 0.97         | 0.89 (0.43 - 1.86)  |
| 28        | F1+2 fragment (T3 vs T1)                      | 1.03         | 0.96         | 0.93 (0.35 - 2.46)  |
| 29        | FVIII:c (T3 vs T1)                            | 1.12         | 1.10         | 0.98 (0.4 - 2.41)   |
| 30        | APC ratio (T3 vs T1)                          | 0.70         | 0.73         | 1.04 (0.42 - 2.59)  |
| 31        | fibrinogen (T3 vs T1)                         | 1.26         | 1.51         | 1.2 (0.56 - 2.55)   |
| 32        | t-PA (T3 vs T1)                               | 1.10         | 1.33         | 1.21 (0.54 - 2.73)  |
| 33        | PLT aggregation (irreversible) (high vs low)  | 1.04         | 1.26         | 1.21 (0.47 - 3.15)  |
| 34        | PAI-1 (T3 vs T1)                              | 1.30         | 1.61         | 1.24 (0.49 - 3.13)  |
| 35        | PLT retention (Q5 vs Q1)                      | 0.80         | 1.05         | 1.31 (0.39 - 4.43)  |
| 36        | FVII:c (T3 vs T1)                             | 0.65         | 0.91         | 1.4 (0.54 - 3.6)    |
| 37        | d-dimer (T3 vs T1)                            | 1.45         | 2.09         | 1.44 (0.63 - 3.32)  |
| 38        | aPTT (T3 vs T1)                               | 0.76         | 1.11         | 1.46 (0.59 - 3.62)  |
| 39        | bleeding time (T1 vs T3)                      | 0.90         | 1.42         | 1.58 (0.19 - 12.93) |
| 40        | prot S rs 867186 (GG vs AA)                   | 1.27         | 1.14         | 0.9 (0.24 - 3.4)    |
| 41        | FVIII:c (SD)                                  | 1.20         | 1.16         | 0.97 (0.74 - 1.26)  |
| 42        | FVIII:c (SD)                                  | 1.13         | 1.15         | 1.02 (0.78 - 1.32)  |
| 43        | prot S rs2069948 (CC vs TT)                   | 1.08         | 1.27         | 1.18 (0.8 - 1.74)   |
| 44        | PAI-1 SNP 4G/5G promotor (allele)             | 0.93         | 1.10         | 1.18 (0.55 - 2.53)  |
| 45        | FII SNP G20210A (dominant)                    | 0.88         | 1.40         | 1.59 (0.16 - 15.37) |
| 46        | FV Leiden (dominant)                          | 0.81         | 0.42         | 0.52 (0.14 - 1.88)  |
| 47        | FV Leiden (dominant)                          | 0.80         | 0.51         | 0.64 (0.08 - 5)     |
| 48        | FII SNP G20210A (dominant)                    | 1.70         | 1.10         | 0.65 (0.19 - 2.2)   |
| 49        | FV Leiden (dominant)                          | 0.83         | 0.68         | 0.82 (0.38 - 1.77)  |
| 50        | FV Leiden (dominant)                          | 0.91         | 0.88         | 0.97 (0.31 - 2.98)  |

|     |                                      |      |      |                     |
|-----|--------------------------------------|------|------|---------------------|
| 51  | FV Leiden (dominant)                 | 0.85 | 0.96 | 1.13 (0.41 - 3.11)  |
| 52  | WWF SNP sma I (recessive)            | 1.81 | 3.29 | 1.82 (0.32 - 10.34) |
| 53  | fibrinopeptide A (T3 vs T1)          | 1.36 | 0.85 | 0.63 (0.31 - 1.26)  |
| 54  | VWF (T3 vs T1)                       | 1.53 | 1.02 | 0.67 (0.31 - 1.44)  |
| 55  | FVII (T3 vs T1)                      | 1.12 | 0.89 | 0.79 (0.31 - 2.05)  |
| 56  | t-PA (T3 vs T1)                      | 1.80 | 1.65 | 0.92 (0.38 - 2.22)  |
| 57  | d-dimer (T3 vs T1)                   | 1.59 | 1.62 | 1.02 (0.43 - 2.41)  |
| 58  | F1+2 fragment (T3 vs T1)             | 0.92 | 1.00 | 1.09 (0.45 - 2.64)  |
| 59  | FVII (SD (log scale))                | 0.98 | 1.08 | 1.1 (0.63 - 1.93)   |
| 60  | VWF (SD (log scale))                 | 0.95 | 1.15 | 1.21 (0.76 - 1.92)  |
| 61  | fibrinogen (T3 vs T1)                | 1.66 | 2.06 | 1.24 (0.56 - 2.75)  |
| 62  | t-PA (SD (log scale))                | 1.25 | 1.69 | 1.35 (0.81 - 2.25)  |
| 63  | fibrinogen (SD (log scale))          | 1.04 | 1.52 | 1.46 (0.96 - 2.22)  |
| 64  | d-dimer (SD (log scale))             | 1.04 | 1.96 | 1.88 (0.81 - 4.4)   |
| 65  | fibrinogen (Q4 vs Q1)                | 2.30 | 2.50 | 1.09 (0.61 - 1.93)  |
| 66  | plasminogen (SD)                     | 1.41 | 1.10 | 0.78 (0.42 - 1.44)  |
| 67  | FVII:ag (SD)                         | 1.11 | 1.01 | 0.91 (0.57 - 1.44)  |
| 68  | FVII:c (SD)                          | 1.01 | 0.93 | 0.92 (0.58 - 1.47)  |
| 69  | fibrinogen (SD)                      | 1.02 | 1.05 | 1.03 (0.69 - 1.53)  |
| 70  | ICAM1 SNP Rs3093030 (allele)         | 1.04 | 0.57 | 0.55 (0.26 - 1.17)  |
| 71  | thombomodulin SNP Rs3176123 (allele) | 0.94 | 0.58 | 0.62 (0.3 - 1.28)   |
| 72  | FV SNP Rs9332575 (allele)            | 1.05 | 0.68 | 0.65 (0.28 - 1.5)   |
| 73  | prot C SNP Rs2069928 (allele)        | 0.96 | 0.73 | 0.76 (0.37 - 1.56)  |
| 74  | FV SNP Rs2269648 (allele)            | 1.11 | 0.86 | 0.77 (0.38 - 1.57)  |
| 75  | thombomodulin SNP Rs3216183 (allele) | 1.02 | 0.81 | 0.79 (0.35 - 1.78)  |
| 76  | FV SNP Rs9332695 (allele)            | 0.85 | 0.71 | 0.84 (0.24 - 2.85)  |
| 77  | prot C SNP Rs5937 (allele)           | 1.21 | 1.04 | 0.86 (0.44 - 1.66)  |
| 78  | prot C SNP Rs1799810 (allele)        | 1.13 | 1.08 | 0.96 (0.49 - 1.86)  |
| 79  | thombomodulin SNP Rs6082986 (allele) | 1.00 | 0.98 | 0.98 (0.46 - 2.07)  |
| 80  | prot C SNP Rs2069923 (allele)        | 1.11 | 1.09 | 0.98 (0.22 - 4.3)   |
| 81  | ICAM1 SNP Rs5030347 (allele)         | 0.97 | 0.97 | 1 (0.93 - 1.08)     |
| 82  | FV SNP Rs6019 (allele)               | 1.13 | 1.13 | 1 (0.21 - 4.68)     |
| 83  | thombomodulin SNP Rs1042580 (allele) | 0.96 | 0.98 | 1.02 (0.49 - 2.14)  |
| 84  | FV SNP Rs9332590 (allele)            | 1.03 | 1.10 | 1.07 (0.55 - 2.08)  |
| 85  | ICAM1 SNP Rs3093032 (allele)         | 1.08 | 1.16 | 1.07 (0.48 - 2.42)  |
| 86  | thombomodulin SNP Rs3176119 (allele) | 0.79 | 0.85 | 1.08 (0.28 - 4.09)  |
| 87  | FV SNP Rs2420369 (allele)            | 1.17 | 1.26 | 1.08 (0.51 - 2.28)  |
| 88  | ICAM1 SNP Rs281432 (allele)          | 1.22 | 1.32 | 1.08 (0.51 - 2.3)   |
| 89  | thombomodulin SNP Rs6113909 (allele) | 0.98 | 1.07 | 1.09 (0.48 - 2.49)  |
| 90  | FV SNP Rs9332618 (allele)            | 0.93 | 1.02 | 1.1 (0.51 - 2.38)   |
| 91  | FV SNP Rs970741 (allele)             | 1.04 | 1.19 | 1.14 (0.55 - 2.4)   |
| 92  | FV SNP Rs9332640 (allele)            | 1.22 | 1.40 | 1.15 (0.52 - 2.55)  |
| 93  | thombomodulin SNP Rs1962 (allele)    | 1.03 | 1.25 | 1.21 (0.56 - 2.64)  |
| 94  | ICAM1 SNP Rs5030341 (allele)         | 1.25 | 1.52 | 1.22 (0.57 - 2.59)  |
| 95  | FV SNP Rs9332591 (allele)            | 1.14 | 1.39 | 1.22 (0.51 - 2.92)  |
| 96  | FV SNP Rs6013 (allele)               | 1.12 | 1.41 | 1.26 (0.47 - 3.37)  |
| 97  | FV SNP Rs6030 (allele)               | 1.11 | 1.41 | 1.27 (0.61 - 2.66)  |
| 98  | ICAM1 SNP Rs5030390 (allele)         | 1.23 | 1.59 | 1.29 (0.3 - 5.61)   |
| 99  | thombomodulin SNP Rs6048519 (allele) | 0.98 | 1.28 | 1.31 (0.63 - 2.69)  |
| 100 | FV SNP Rs3753305 (allele)            | 0.98 | 1.36 | 1.39 (0.67 - 2.86)  |
| 101 | prot C SNP Rs1401296 (allele)        | 1.04 | 1.48 | 1.42 (0.67 - 3.03)  |
| 102 | FV SNP Rs6035 (allele)               | 1.26 | 2.19 | 1.74 (0.56 - 5.4)   |
| 103 | prot C SNP Rs2069920 (allele)        | 0.79 | 1.52 | 1.92 (0.93 - 3.96)  |

|     |                                  |      |      |                    |
|-----|----------------------------------|------|------|--------------------|
| 104 | FV SNP Rs7542281 (allele)        | 1.11 | 2.46 | 2.22 (0.65 - 7.56) |
| 105 | FV Leiden (allele)               | 1.22 | 2.98 | 2.44 (0.6 - 10)    |
| 106 | fibrinogen (T1 vs T3)            | 0.62 | 0.40 | 0.65               |
| 107 | fibrinogen (T1 vs T3)            | 0.56 | 0.94 | 1.68               |
| 108 | PSGL-1 VNTR (allele)             | 0.89 | 0.51 | 0.57 (0.25 - 1.33) |
| 109 | GPIb-alpha SNP HPA-2 (allele)    | 2.09 | 2.40 | 1.15 (0.23 - 5.65) |
| 110 | GPIb-alpha VNTR (allele)         | 1.71 | 2.23 | 1.3 (0.31 - 5.43)  |
| 111 | FXIIIa SNP Val34Leu (dominant)   | 1.00 | 1.33 | 1.33 (0.62 - 2.84) |
| 112 | FVII SNP 16826 (allele)          | 1.75 | 0.49 | 0.28 (0.03 - 2.4)  |
| 113 | FV SNP upper 46058 (allele)      | 1.74 | 1.07 | 0.61 (0.21 - 1.83) |
| 114 | FIX SNP 12806 (allele)           | 1.54 | 0.99 | 0.64 (0.24 - 1.74) |
| 115 | FXIIIa SNP 72060 (allele)        | 1.00 | 0.67 | 0.67 (0.27 - 1.66) |
| 116 | FV SNP upper 72877 (allele)      | 1.20 | 0.82 | 0.68 (0.35 - 1.32) |
| 117 | TAFI SNP 36326 (allele)          | 1.10 | 0.81 | 0.74 (0.37 - 1.47) |
| 118 | prot C receptor SNP 837 (allele) | 1.00 | 0.74 | 0.74 (0.46 - 1.2)  |
| 119 | TAFI SNP 18857 (allele)          | 1.17 | 0.87 | 0.74 (0.35 - 1.59) |
| 120 | plasminogen SNP 41494 (allele)   | 1.15 | 0.87 | 0.76 (0.31 - 1.87) |
| 121 | FGA 3807 (allele)                | 1.07 | 0.82 | 0.77 (0.52 - 1.12) |
| 122 | FXII SNP 6570 (allele)           | 1.16 | 0.89 | 0.77 (0.34 - 1.75) |
| 123 | FX SNP 9501 (allele)             | 0.99 | 0.76 | 0.77 (0.51 - 1.17) |
| 124 | FIX SNP 30893 (allele)           | 0.82 | 0.63 | 0.77 (0.28 - 2.08) |
| 125 | t-PA SNP 30619 (allele)          | 1.07 | 0.83 | 0.78 (0.51 - 1.18) |
| 126 | t-PA SNP 2586 (allele)           | 0.93 | 0.73 | 0.78 (0.41 - 1.51) |
| 127 | thombomodulin SNP 6235 (allele)  | 1.09 | 0.88 | 0.81 (0.58 - 1.13) |
| 128 | FXI SNP 3450 (allele)            | 1.00 | 0.81 | 0.81 (0.59 - 1.11) |
| 129 | TAFI SNP 54691 (allele)          | 1.10 | 0.91 | 0.83 (0.61 - 1.12) |
| 130 | prot C SNP 4515 (allele)         | 1.07 | 0.89 | 0.83 (0.63 - 1.1)  |
| 131 | plasminogen SNP 18114 (allele)   | 1.21 | 1.01 | 0.83 (0.63 - 1.11) |
| 132 | TAFI SNP 4947 (allele)           | 1.30 | 1.11 | 0.85 (0.51 - 1.42) |
| 133 | prot C SNP 4919 (allele)         | 1.05 | 0.91 | 0.87 (0.67 - 1.13) |
| 134 | FGB 9487 (allele)                | 1.00 | 0.87 | 0.87 (0.62 - 1.23) |
| 135 | prot C SNP 3220 (allele)         | 1.00 | 0.87 | 0.87 (0.42 - 1.79) |
| 136 | FIX SNP 4135 (allele)            | 1.17 | 1.02 | 0.87 (0.55 - 1.39) |
| 137 | FV SNP upper 66464 (allele)      | 1.06 | 0.94 | 0.89 (0.51 - 1.53) |
| 138 | TFPI SNP 21164 (allele)          | 1.09 | 0.97 | 0.89 (0.51 - 1.56) |
| 139 | FGB 1643 (allele)                | 1.02 | 0.91 | 0.89 (0.64 - 1.24) |
| 140 | FXIIIa SNP 165306 (allele)       | 1.12 | 1.01 | 0.9 (0.65 - 1.25)  |
| 141 | FXIIIB SNP 9706 (allele)         | 1.05 | 0.95 | 0.9 (0.64 - 1.29)  |
| 142 | prot S SNP 13154 (allele)        | 1.06 | 0.96 | 0.91 (0.65 - 1.25) |
| 143 | FVIII SNP 95910 (allele)         | 1.28 | 1.16 | 0.91 (0.42 - 1.96) |
| 144 | FXIIIa SNP 170779 (allele)       | 1.12 | 1.02 | 0.91 (0.64 - 1.29) |
| 145 | TAFI SNP 35605 (allele)          | 1.04 | 0.95 | 0.91 (0.69 - 1.21) |
| 146 | plasminogen SNP 406 (allele)     | 0.97 | 0.89 | 0.92 (0.7 - 1.2)   |
| 147 | FV SNP upper 42713 (allele)      | 1.10 | 1.02 | 0.93 (0.7 - 1.23)  |
| 148 | FGG 902 (allele)                 | 1.10 | 1.02 | 0.93 (0.7 - 1.22)  |
| 149 | FV SNP 17557 (allele)            | 1.04 | 0.97 | 0.93 (0.7 - 1.25)  |
| 150 | prot S SNP 66205 (allele)        | 1.07 | 1.00 | 0.93 (0.72 - 1.21) |
| 151 | TAFI SNP 7826 (allele)           | 0.92 | 0.86 | 0.93 (0.72 - 1.22) |
| 152 | FIX SNP 10948 (allele)           | 1.08 | 1.01 | 0.94 (0.4 - 2.2)   |
| 153 | plasminogen SNP 54925 (allele)   | 1.09 | 1.02 | 0.94 (0.51 - 1.72) |
| 154 | t-PA SNP 12047 (allele)          | 0.99 | 0.93 | 0.94 (0.73 - 1.21) |
| 155 | plasminogen SNP 1983 (allele)    | 1.02 | 0.96 | 0.94 (0.67 - 1.33) |
| 156 | t-PA SNP 12264 (allele)          | 1.02 | 0.96 | 0.94 (0.6 - 1.47)  |

|     |                                        |      |      |                    |
|-----|----------------------------------------|------|------|--------------------|
| 157 | FXIIIA SNP 165399 (allele)             | 1.04 | 0.98 | 0.94 (0.71 - 1.26) |
| 158 | TAFI SNP 10152 (allele)                | 1.07 | 1.01 | 0.94 (0.7 - 1.28)  |
| 159 | TFPI SNP 1502 (allele)                 | 1.10 | 1.04 | 0.95 (0.71 - 1.25) |
| 160 | TF SNP 13925 (allele)                  | 1.11 | 1.05 | 0.95 (0.71 - 1.27) |
| 161 | FX SNP 11962 (allele)                  | 0.99 | 0.94 | 0.95 (0.73 - 1.24) |
| 162 | FGA 9205 (allele)                      | 0.99 | 0.94 | 0.95 (0.66 - 1.37) |
| 163 | TAFI SNP 2103 (allele)                 | 0.99 | 0.94 | 0.95 (0.65 - 1.39) |
| 164 | FX SNP 16893 (allele)                  | 1.00 | 0.95 | 0.95 (0.74 - 1.22) |
| 165 | FXI SNP 25455 (allele)                 | 1.01 | 0.96 | 0.95 (0.71 - 1.26) |
| 166 | FXI SNP 3543 (allele)                  | 1.04 | 0.99 | 0.95 (0.73 - 1.24) |
| 167 | FXIIIA SNP 176866 (allele)             | 1.08 | 1.03 | 0.95 (0.68 - 1.34) |
| 168 | FX SNP 26242 (allele)                  | 0.92 | 0.88 | 0.96 (0.66 - 1.38) |
| 169 | FV SNP upper 66872 (allele)            | 0.94 | 0.90 | 0.96 (0.68 - 1.35) |
| 170 | FVII SNP 18311 (allele)                | 0.97 | 0.93 | 0.96 (0.73 - 1.26) |
| 171 | t-PA SNP 6971 (allele)                 | 0.99 | 0.95 | 0.96 (0.6 - 1.53)  |
| 172 | FX SNP 18352 (allele)                  | 1.02 | 0.98 | 0.96 (0.64 - 1.45) |
| 173 | antithrombin SNP 7199 (allele)         | 1.05 | 1.01 | 0.96 (0.62 - 1.49) |
| 174 | prot C SNP 4732 (allele)               | 0.97 | 0.94 | 0.97 (0.7 - 1.33)  |
| 175 | prot C receptor SNP 6196 (allele)      | 0.98 | 0.95 | 0.97 (0.73 - 1.28) |
| 176 | FV SNP lower 3578 (allele)             | 1.02 | 0.99 | 0.97 (0.74 - 1.27) |
| 177 | FGB 11079 (allele)                     | 1.02 | 0.99 | 0.97 (0.73 - 1.28) |
| 178 | FXIIIA SNP 177778 (allele)             | 1.12 | 1.09 | 0.97 (0.57 - 1.67) |
| 179 | FXIIIB SNP 5995 (allele)               | 0.92 | 0.90 | 0.98 (0.75 - 1.28) |
| 180 | FV SNP upper 45765 (allele)            | 1.00 | 0.98 | 0.98 (0.56 - 1.71) |
| 181 | FXIIIB SNP 29759 (allele)              | 1.11 | 1.09 | 0.98 (0.75 - 1.28) |
| 182 | FV SNP lower 35788 (allele)            | 1.15 | 1.13 | 0.98 (0.58 - 1.65) |
| 183 | FGG 129 (allele)                       | 0.94 | 0.93 | 0.99 (0.73 - 1.34) |
| 184 | antithrombin SNP 1734 (allele)         | 1.02 | 1.01 | 0.99 (0.64 - 1.54) |
| 185 | FIX SNP 21975 (allele)                 | 0.96 | 0.96 | 1 (0.6 - 1.66)     |
| 186 | TF SNP 599 (allele)                    | 0.92 | 0.92 | 1 (0.76 - 1.31)    |
| 187 | prot S SNP 430 (allele)                | 0.94 | 0.94 | 1 (0.76 - 1.31)    |
| 188 | TAFI SNP 48100 (allele)                | 0.87 | 0.87 | 1 (0.63 - 1.58)    |
| 189 | TF SNP 5334 (allele)                   | 1.08 | 1.09 | 1.01 (0.74 - 1.37) |
| 190 | PAI-1 SNP 4588 (allele)                | 1.01 | 1.02 | 1.01 (0.68 - 1.49) |
| 191 | PAI-1 SNP 12219 (allele)               | 1.01 | 1.02 | 1.01 (0.79 - 1.3)  |
| 192 | FVII SNP 2643 (allele)                 | 0.99 | 1.00 | 1.01 (0.76 - 1.34) |
| 193 | prot C SNP 5867 (allele)               | 0.98 | 0.99 | 1.01 (0.73 - 1.39) |
| 194 | FGA 6534 (allele)                      | 0.96 | 0.97 | 1.01 (0.77 - 1.33) |
| 195 | FXII SNP 7532 (allele)                 | 1.04 | 1.06 | 1.02 (0.77 - 1.34) |
| 196 | prot C receptor SNP rs1415772 (allele) | 1.02 | 1.04 | 1.02 (0.74 - 1.4)  |
| 197 | FX SNP 8946 (allele)                   | 0.99 | 1.01 | 1.02 (0.78 - 1.33) |
| 198 | FVII SNP 185 (allele)                  | 0.95 | 0.97 | 1.02 (0.74 - 1.4)  |
| 199 | PAI-1 SNP 10381 (allele)               | 0.94 | 0.96 | 1.02 (0.63 - 1.66) |
| 200 | TAFI SNP 31427 (allele)                | 0.94 | 0.96 | 1.02 (0.77 - 1.35) |
| 201 | TAFI SNP 32627 (allele)                | 0.94 | 0.96 | 1.02 (0.77 - 1.35) |
| 202 | FXI SNP 20423 (allele)                 | 0.91 | 0.93 | 1.02 (0.72 - 1.46) |
| 203 | plasminogen SNP 31439 (allele)         | 0.83 | 0.85 | 1.02 (0.75 - 1.39) |
| 204 | t-PA SNP 17825 (allele)                | 1.01 | 1.04 | 1.03 (0.79 - 1.35) |
| 205 | FXI SNP 228771 (allele)                | 1.00 | 1.03 | 1.03 (0.78 - 1.35) |
| 206 | prot S SNP 66847 (allele)              | 1.00 | 1.03 | 1.03 (0.66 - 1.62) |
| 207 | thombomodulin SNP 5110 (allele)        | 0.96 | 0.99 | 1.03 (0.77 - 1.37) |
| 208 | prot C SNP 10454 (allele)              | 0.93 | 0.96 | 1.03 (0.74 - 1.44) |
| 209 | TFPI SNP 3437 (allele)                 | 1.08 | 1.12 | 1.04 (0.57 - 1.89) |

|     |                                 |      |      |                    |
|-----|---------------------------------|------|------|--------------------|
| 210 | prot S SNP 288 (allele)         | 1.05 | 1.09 | 1.04 (0.74 - 1.45) |
| 211 | t-PA SNP 9823 (allele)          | 0.98 | 1.02 | 1.04 (0.8 - 1.36)  |
| 212 | FGB 1083 (allele)               | 0.97 | 1.01 | 1.04 (0.71 - 1.52) |
| 213 | TF SNP 7877 (allele)            | 1.12 | 1.17 | 1.04 (0.58 - 1.9)  |
| 214 | FII SNP 7530 (allele)           | 1.10 | 1.15 | 1.05 (0.73 - 1.5)  |
| 215 | FII SNP 5467 (allele)           | 1.09 | 1.14 | 1.05 (0.72 - 1.52) |
| 216 | prot C SNP 2583 (allele)        | 1.01 | 1.06 | 1.05 (0.8 - 1.37)  |
| 217 | FV SNP upper 68717 (allele)     | 0.97 | 1.02 | 1.05 (0.8 - 1.37)  |
| 218 | PAI-1 SNP 5878 (allele)         | 0.95 | 1.00 | 1.05 (0.75 - 1.47) |
| 219 | FV SNP upper 45888 (allele)     | 0.91 | 0.96 | 1.05 (0.78 - 1.42) |
| 220 | plasminogen SNP 2967 (allele)   | 1.04 | 1.10 | 1.06 (0.81 - 1.38) |
| 221 | TF SNP 11185 (allele)           | 0.86 | 0.91 | 1.06 (0.52 - 2.16) |
| 222 | FVII SNP 15386 (allele)         | 1.00 | 1.06 | 1.06 (0.7 - 1.61)  |
| 223 | FIX SNP 716 (allele)            | 1.00 | 1.06 | 1.06 (0.66 - 1.71) |
| 224 | FXIIIB SNP 17686 (allele)       | 1.08 | 1.15 | 1.06 (0.78 - 1.45) |
| 225 | FXIIIB SNP 7319 (allele)        | 0.90 | 0.96 | 1.07 (0.69 - 1.66) |
| 226 | antithrombin SNP 9089 (allele)  | 1.01 | 1.08 | 1.07 (0.81 - 1.41) |
| 227 | FII SNP 21239 (allele)          | 1.00 | 1.07 | 1.07 (0.82 - 1.4)  |
| 228 | FX SNP 17396 (allele)           | 0.98 | 1.05 | 1.07 (0.8 - 1.44)  |
| 229 | t-PA SNP 16039 (allele)         | 0.98 | 1.05 | 1.07 (0.82 - 1.41) |
| 230 | TAFI SNP 47956 (allele)         | 1.05 | 1.13 | 1.08 (0.72 - 1.62) |
| 231 | thombomodulin SNP 5318 (allele) | 1.03 | 1.11 | 1.08 (0.78 - 1.49) |
| 232 | thombomodulin SNP 4007 (allele) | 1.02 | 1.10 | 1.08 (0.78 - 1.49) |
| 233 | prot S SNP 26890 (allele)       | 0.98 | 1.06 | 1.08 (0.7 - 1.67)  |
| 234 | FGG 9340 (allele)               | 0.94 | 1.02 | 1.09 (0.81 - 1.46) |
| 235 | FIX SNP 21554 (allele)          | 0.99 | 1.08 | 1.09 (0.66 - 1.8)  |
| 236 | plasminogen SNP 41108 (allele)  | 0.92 | 1.01 | 1.1 (0.77 - 1.57)  |
| 237 | plasminogen SNP 1470 (allele)   | 1.00 | 1.10 | 1.1 (0.77 - 1.58)  |
| 238 | FXI SNP 26011 (allele)          | 1.06 | 1.17 | 1.1 (0.75 - 1.62)  |
| 239 | FV SNP lower 30539 (allele)     | 1.05 | 1.16 | 1.1 (0.72 - 1.7)   |
| 240 | FIX SNP 27226 (allele)          | 1.04 | 1.15 | 1.11 (0.62 - 1.97) |
| 241 | FIX SNP 35124 (allele)          | 1.04 | 1.15 | 1.11 (0.64 - 1.92) |
| 242 | FII SNP G20210A (allele)        | 1.39 | 1.54 | 1.11 (0.41 - 3.03) |
| 243 | TFPI SNP 34214 (allele)         | 0.91 | 1.01 | 1.11 (0.83 - 1.48) |
| 244 | antithrombin SNP 2415 (allele)  | 1.00 | 1.11 | 1.11 (0.75 - 1.65) |
| 245 | PAI-1 SNP 664 (allele)          | 0.99 | 1.10 | 1.11 (0.84 - 1.48) |
| 246 | FIX SNP 6347 (allele)           | 0.94 | 1.05 | 1.12 (0.68 - 1.84) |
| 247 | FXIIIA SNP 148318 (allele)      | 1.02 | 1.14 | 1.12 (0.8 - 1.55)  |
| 248 | FXI SNP 6783 (allele)           | 1.10 | 1.23 | 1.12 (0.69 - 1.81) |
| 249 | t-PA SNP 22323 (allele)         | 0.93 | 1.04 | 1.12 (0.79 - 1.59) |
| 250 | FIX SNP 16171 (allele)          | 0.76 | 0.85 | 1.12 (0.44 - 2.84) |
| 251 | plasminogen SNP 15255 (allele)  | 0.96 | 1.08 | 1.13 (0.87 - 1.46) |
| 252 | FII SNP 4992 (allele)           | 1.03 | 1.16 | 1.13 (0.83 - 1.52) |
| 253 | FII SNP 280 (allele)            | 0.94 | 1.06 | 1.13 (0.7 - 1.82)  |
| 254 | t-PA SNP 35171 (allele)         | 1.00 | 1.13 | 1.13 (0.85 - 1.51) |
| 255 | FGG 5836 (allele)               | 1.13 | 1.28 | 1.13 (0.57 - 2.24) |
| 256 | TAFI SNP 51208 (allele)         | 1.03 | 1.17 | 1.14 (0.86 - 1.5)  |
| 257 | FII SNP 5389 (allele)           | 1.01 | 1.15 | 1.14 (0.86 - 1.51) |
| 258 | FX SNP 14881 (allele)           | 0.97 | 1.11 | 1.14 (0.79 - 1.65) |
| 259 | FII SNP 3696 (allele)           | 1.03 | 1.18 | 1.15 (0.51 - 2.58) |
| 260 | FGA 251 (allele)                | 0.93 | 1.07 | 1.15 (0.87 - 1.52) |
| 261 | antithrombin SNP 5403 (allele)  | 0.91 | 1.06 | 1.16 (0.54 - 2.51) |
| 262 | TFPI SNP 2418 (allele)          | 0.90 | 1.05 | 1.17 (0.9 - 1.51)  |

|     |                                                         |      |      |                     |
|-----|---------------------------------------------------------|------|------|---------------------|
| 263 | t-PA SNP 6388 (allele)                                  | 0.92 | 1.10 | 1.2 (0.74 - 1.92)   |
| 264 | FV SNP lower 29565 (allele)                             | 0.96 | 1.16 | 1.21 (0.87 - 1.69)  |
| 265 | FXI SNP 10942 (allele)                                  | 1.06 | 1.29 | 1.22 (0.83 - 1.78)  |
| 266 | prot C SNP 11310 (allele)                               | 0.95 | 1.16 | 1.22 (0.92 - 1.62)  |
| 267 | FGA 5498 (allele)                                       | 0.92 | 1.15 | 1.25 (0.84 - 1.86)  |
| 268 | FX SNP 4544 (allele)                                    | 0.96 | 1.20 | 1.25 (0.83 - 1.87)  |
| 269 | FXIIIA SNP 4377 (allele)                                | 0.92 | 1.16 | 1.26 (0.93 - 1.71)  |
| 270 | t-PA SNP 9944 (allele)                                  | 0.84 | 1.08 | 1.29 (0.66 - 2.5)   |
| 271 | FVII SNP 115 (allele)                                   | 1.07 | 1.40 | 1.31 (0.28 - 6.14)  |
| 272 | plasminogen SNP 34158 (allele)                          | 1.20 | 1.58 | 1.32 (0.7 - 2.49)   |
| 273 | prot C receptor SNP 3600 (allele)                       | 0.74 | 0.99 | 1.34 (0.6 - 2.97)   |
| 274 | FVIII SNP 139972 (allele)                               | 0.83 | 1.20 | 1.45 (0.68 - 3.08)  |
| 275 | FV SNP upper 38592 (allele)                             | 1.03 | 1.53 | 1.49 (0.69 - 3.21)  |
| 276 | FVIII SNP 55941 (allele)                                | 1.04 | 1.56 | 1.5 (0.9 - 2.5)     |
| 277 | FXI SNP 4197 (allele)                                   | 0.96 | 1.52 | 1.58 (0.61 - 4.1)   |
| 278 | FVIII SNP 95826 (allele)                                | 0.94 | 1.70 | 1.81 (1.02 - 3.2)   |
| 279 | FX SNP 22739 (allele)                                   | 0.69 | 1.31 | 1.9 (0.21 - 16.96)  |
| 280 | FVIII SNP 25167 (allele)                                | 0.75 | 2.10 | 2.8 (0.7 - 11.2)    |
| 281 | FXIIIA SNP 177424 rs3024462 (allele)                    | 0.49 | 1.82 | 3.71 (0.62 - 22.35) |
| 282 | FVIII SNP 165293 rs6655259 (allele)                     | 0.54 | 2.55 | 4.72 (0.62 - 35.73) |
| 283 | PAI-1 SNP 4G/5G promotor (4G/4G vs 5G/5G)               | 0.96 | 0.49 | 0.51 (0.11 - 2.4)   |
| 284 | fibrinogen (SD)                                         | 1.30 | 1.01 | 0.78 (0.61 - 0.98)  |
| 285 | FII SNP G20210A (dominant)                              | 5.42 | 4.00 | 0.74 (0 - 112.99)   |
| 286 | FV Leiden (dominant)                                    | 3.75 | 4.28 | 1.14 (0.05 - 24.1)  |
| 287 | t-PA (Q4 vs Q1)                                         | 5.89 | 2.32 | 0.39 (0.07 - 2.07)  |
| 288 | PAI-1 (Q4 vs Q1)                                        | 3.35 | 1.32 | 0.39 (0.08 - 1.88)  |
| 289 | KAL-C1-INH (T3 vs T1)                                   | 0.73 | 0.67 | 0.92 (0.28 - 2.99)  |
| 290 | FXIa-AT-INH (T3 vs T1)                                  | 1.31 | 1.22 | 0.93 (0.23 - 3.82)  |
| 291 | FXIIa-C1-INH (T3 vs T1)                                 | 0.73 | 0.86 | 1.18 (0.37 - 3.77)  |
| 292 | FXIa-C1-INH (T3 vs T1)                                  | 1.05 | 1.51 | 1.44 (0.41 - 5.02)  |
| 293 | fibrinogen (>300 mg/dl)                                 | 3.68 | 2.72 | 0.74 (0.11 - 5.05)  |
| 294 | FV Leiden (dominant)                                    | 0.76 | 2.60 | 3.42 (0.11 - 104)   |
| 295 | FV Leiden (dominant)                                    | 1.50 | 1.00 | 0.67 (0.14 - 3.13)  |
| 296 | fibrinogen SNP C148T (or G455A) (allele)                | 1.10 | 0.93 | 0.85 (0.45 - 1.6)   |
| 297 | FII SNP G20210A (dominant)                              | 0.80 | 1.10 | 1.38 (0.31 - 6.05)  |
| 298 | anti-cardiolipin IgG (>95 percentile)                   | 1.80 | 0.90 | 0.5 (0.11 - 2.25)   |
| 299 | FGA SNP Thr312Ala rs6050 (allele)                       | 0.82 | 0.43 | 0.52 (0.15 - 1.8)   |
| 300 | CLT (hyperfibrinolysis vs normofibrinolysis) (T3 vs T2) | 2.82 | 1.50 | 0.53 (0.16 - 1.8)   |
| 301 | FXIIIA SNP Pro564Leu (dominant)                         | 1.40 | 0.89 | 0.64 (0.31 - 1.29)  |
| 302 | FXIIIA SNP Val34Leu (dominant)                          | 1.07 | 0.77 | 0.72 (0.36 - 1.43)  |
| 303 | FII SNP G20210A (dominant)                              | 1.00 | 1.00 | 1 (0.12 - 8.33)     |
| 304 | VWF (Q4 vs Q1)                                          | 4.20 | 6.70 | 1.6 (0.4 - 6.38)    |
| 305 | FV Leiden (dominant)                                    | 1.10 | 1.80 | 1.64 (0.45 - 6)     |
| 306 | FGB SNP 455G/A rs1800790 (allele)                       | 0.98 | 1.76 | 1.8 (0.32 - 10.06)  |
| 307 | FXIIIB SNP His95Arg (dominant)                          | 0.79 | 1.70 | 2.15 (0.88 - 5.25)  |
| 308 | ADAMTS13 (Q1 vs Q4)                                     | 1.40 | 3.10 | 2.21 (0.65 - 7.51)  |
| 309 | anti-prothrombin IgG (>95 percentile)                   | 0.80 | 1.80 | 2.25 (0.38 - 13.5)  |
| 310 | FXIa-AT-INH (>90 percentile)                            | 0.94 | 2.18 | 2.32 (0.68 - 7.95)  |
| 311 | anti-beta2GP (>95 percentile)                           | 1.20 | 2.80 | 2.33 (0.63 - 8.71)  |
| 312 | KAL-C1-INH (>90 percentile)                             | 2.12 | 5.14 | 2.42 (0.77 - 7.64)  |
| 313 | FXIIa-C1-INH (>90 percentile)                           | 0.74 | 1.87 | 2.53 (0.74 - 8.6)   |

|     |                                                         |      |       |                      |
|-----|---------------------------------------------------------|------|-------|----------------------|
| 314 | CLT (hypofibrinolysis vs. normofibrinolysis) (T1 vs T2) | 1.60 | 4.07  | 2.54 (0.71 - 9.09)   |
| 315 | FXIa-C1-INH (>90 percentile)                            | 1.13 | 2.92  | 2.58 (0.77 - 8.72)   |
| 316 | lupus anticoagulant (ratio >=1.15)                      | 5.30 | 43.10 | 8.13 (0.61 - 108.76) |
| 317 | FXIIIa SNP Tyr204phe (dominant)                         | 0.82 | 9.10  | 11.1 (5.64 - 21.82)  |
| 318 | FV Leiden (dominant)                                    | 2.40 | 0.00  | 0                    |
| 319 | FII SNP G20210A (dominant)                              | 4.00 | 1.60  | 0.4 (0 - 77.58)      |
| 320 | GPIIb SNP ile/Ser (recessive)                           | 1.85 | 1.20  | 0.65 (0.18 - 2.37)   |
| 321 | GPIIIa SNP Leu/pro (recessive)                          | 1.14 | 1.01  | 0.89 (0.24 - 3.27)   |
| 322 | GPIa SNP glu/Lys (recessive)                            | 1.06 | 0.96  | 0.91 (0.18 - 4.58)   |
| 323 | PAI-1 SNP 4G/5G (4G/4G vs 5G/5G)                        | 0.40 | 0.49  | 1.23 (0.24 - 6.14)   |
| 324 | FXIIIa SNP Pro564Leu (dominant)                         | 0.80 | 0.99  | 1.24 (0.33 - 4.63)   |
| 325 | FXIIIa SNP Val34Leu (Val/Leu vs Val/Val)                | 0.80 | 1.19  | 1.49 (0.4 - 5.5)     |
| 326 | PAI-1 SNP 4G/5G (allele)                                | 0.50 | 0.84  | 1.68 (0.45 - 6.24)   |
| 327 | GPIa SNP C807T (recessive)                              | 1.26 | 2.24  | 1.78 (0.45 - 7.04)   |
| 328 | FXIIIa SNP Tir204Phe (dominant)                         | 1.02 | 1.95  | 1.91 (0.2 - 18.29)   |
| 329 | PAI-1 SNP 4G/5G (4G/5G vs 4G/4G)                        | 0.52 | 1.10  | 2.12 (0.51 - 8.69)   |
| 330 | GPIb SNP thr/Met (recessive)                            | 0.58 | 1.48  | 2.55 (0.48 - 13.69)  |
| 331 | FXIIIa SNP Val34Leu (Leu/Leu vs Val/Val)                | 0.77 | 3.59  | 4.66 (0.44 - 49.1)   |
| 332 | VWF (Q4 vs Q1)                                          | 1.39 | 1.25  | 0.9 (0.41 - 1.97)    |
| 333 | d-dimer (high vs low)                                   | 2.10 | 2.60  | 1.24 (0.27 - 5.63)   |
| 334 | FV Leiden (dominant)                                    | 0.77 | 1.12  | 1.45 (0.16 - 13.07)  |
| 335 | aPTT (for Protein C) (Q1 vs Q5)                         | 1.53 | 2.43  | 1.59 (0.35 - 7.26)   |
| 336 | VWF SNP P475S (dominant)                                | 0.56 | 0.98  | 1.75 (0.1 - 31.18)   |
| 337 | FXII SNP (dominant)                                     | 4.80 | 4.10  | 0.85 (0.06 - 12.73)  |
| 338 | VWF (SD)                                                | 1.04 | 0.97  | 0.93 (0.65 - 1.34)   |
| 339 | fibrinogen (SD)                                         | 1.13 | 1.14  | 1.01 (0.68 - 1.51)   |
| 340 | d-dimer (SD)                                            | 1.02 | 1.27  | 1.25 (0.72 - 2.16)   |
| 341 | t-PA (SD)                                               | 1.04 | 1.60  | 1.54 (0.55 - 4.34)   |
| 342 | fibrinogen (Q5 vs Q1)                                   | 2.45 | 1.63  | 0.67 (0.14 - 3.25)   |
| 343 | VWF (Q5 vs Q1)                                          | 1.52 | 1.06  | 0.7 (0.16 - 3.06)    |
| 344 | d-dimer (Q5 vs Q1)                                      | 1.49 | 1.09  | 0.73 (0.12 - 4.38)   |
| 345 | trombin generation (PEAK) (SD)                          | 1.71 | 1.31  | 0.77 (0.38 - 1.53)   |
| 346 | trombin generation (PEAK) (SD)                          | 1.04 | 1.31  | 1.26 (0.76 - 2.1)    |
| 347 | trombin generation (PEAK) (SD)                          | 1.03 | 1.31  | 1.27 (0.83 - 1.95)   |
| 348 | fibrinogen (SD (log scale))                             | 1.52 | 1.36  | 0.89 (0.65 - 1.24)   |
| 349 | FVII:c (unit log) (SD (log scale))                      | 0.98 | 1.07  | 1.09 (0.74 - 1.6)    |
| 350 | t-PA (Q4 vs Q1)                                         | 3.20 | 1.42  | 0.44 (0.17 - 1.15)   |
| 351 | d-dimer (Q4 vs Q1)                                      | 1.70 | 1.52  | 0.89 (0.39 - 2.06)   |

ID, identification number; RR IS, relative risk for ischaemic stroke; RR MI, relative risk for myocardial infarction; RRR relative risk ratio.
